# Supplementary material
Source: bioRxiv or medRxiv preprint supplement (https://www.biorxiv.org/highwire/filestream/96063/field_highwire_adjunct_files/2/313072-3.pdf)
Supplement: Supplementary file [file 313072-3.pdf]

**Suppl. Table 3.** Effect of omeprazole (OME) on HSV-1 and HSV-2 titres in HaCat cells alone or in combination with acyclovir (ACV).

| <b>HSV-1</b>             | <b>Virus titre (TCID<sub>50</sub>/mL)</b> | <b>Fold reduction relative to control</b> |
|--------------------------|-------------------------------------------|-------------------------------------------|
| Control                  | $1.3 \times 10^8 \pm 7.0 \times 10^7$     |                                           |
| ACV 1µg/mL               | $1.2 \times 10^7 \pm 3.5 \times 10^6$     | 10.6                                      |
| OME 10µg/mL              | $7.2 \times 10^7 \pm 1.4 \times 10^7$     | 1.8                                       |
| OME 10µg/mL + ACV 1µg/mL | $4.9 \times 10^6 \pm 1.4 \times 10^6$     | 26.5                                      |
| OME 20µg/mL              | $9.9 \times 10^7 \pm 2.7 \times 10^7$     | 1.3                                       |
| OME 20µg/mL + ACV 1µg/mL | $5.1 \times 10^5 \pm 2.6 \times 10^5$     | 255                                       |
| OME 40µg/mL              | $5.9 \times 10^7 \pm 1.9 \times 10^7$     | 2.2                                       |
| OME 40µg/mL + ACV 1µg/mL | $1.0 \times 10^5 \pm 5.3 \times 10^4$     | 1,302                                     |
| OME 80µg/mL              | $2.0 \times 10^6 \pm 1.9 \times 10^6$     | 63.9                                      |
| OME 80µg/mL + ACV 1µg/mL | $8.0 \times 10^2 \pm 7.2 \times 10^2$     | 161,371                                   |

| <b>HSV-2</b>             | <b>Virus titre (TCID<sub>50</sub>/mL)</b> | <b>Fold reduction relative to control</b> |
|--------------------------|-------------------------------------------|-------------------------------------------|
| Control                  | $5.1 \times 10^7 \pm 9.4 \times 10^6$     |                                           |
| ACV 1µg/mL               | $1.1 \times 10^6 \pm 3.6 \times 10^5$     | 48.0                                      |
| OME 10µg/mL              | $2.3 \times 10^7 \pm 1.7 \times 10^6$     | 2.3                                       |
| OME 10µg/mL + ACV 2µg/mL | $3.3 \times 10^5 \pm 2.1 \times 10^5$     | 156                                       |
| OME 20µg/mL              | $1.4 \times 10^7 \pm 5.7 \times 10^6$     | 3.6                                       |
| OME 20µg/mL + ACV 2µg/mL | $1.1 \times 10^5 \pm 7.1 \times 10^4$     | 465                                       |
| OME 40µg/mL              | $3.1 \times 10^5 \pm 2.5 \times 10^5$     | 167                                       |
| OME 40µg/mL + ACV 2µg/mL | $3.4 \times 10^3 \pm 4.7 \times 10^3$     | 152,78                                    |
| OME 80µg/mL              | $5.6 \times 10^3 \pm 3.3 \times 10^3$     | 9226                                      |
| OME 80µg/mL + ACV 2µg/mL | 0                                         | N/A <sup>1</sup>                          |

<sup>1</sup> not applicable
